# Supplementary material
Source: Springer Nature journal article supplement (https://www.springermedizin.de/resource/supplementary/13018_2008_117_MOESM3_ESM.pdf/9636352)
Supplement: MOESM3 [file 9636352]

### SF-36

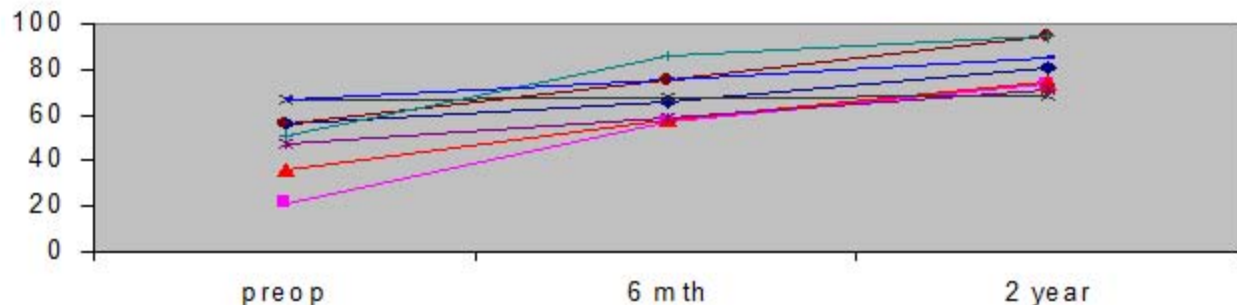

|                   |               |                 |
|-------------------|---------------|-----------------|
| Physical Function | Role Physical | Bodily Pain     |
| General Health    | Vitality      | Social Function |
| Role Emotional    | Mental Health |                 |

|                   | preop | 6 mth       | 2 years     |
|-------------------|-------|-------------|-------------|
| Physical Function | 56.2  | 65.8 p=0.04 | 80.9 p=0.02 |
| Role Physical     | 20.9  | 56.8 p=0.02 | 73.5 p=0.01 |
| Bodily Pain       | 35.5  | 57.9 p=0.03 | 74.4 p=0.02 |
| General Health    | 66.4  | 67.1 p=0.13 | 68.5 p=0.10 |
| Vitality          | 47.3  | 58.3 p=0.04 | 71.5 p=0.02 |
| Social Function   | 56.1  | 75.4 p=0.02 | 94.1 p=0.01 |
| Role Emotional    | 50.9  | 85.9 p=0.01 | 94.1 p=0.01 |
| Mental Health     | 66    | 74.8 p=0.03 | 84.5 p=0.02 |
